# Supplementary material for: Geminin overexpression-dependent recruitment and crosstalk with mesenchymal stem cells enhance aggressiveness in triple negative breast cancers
Source: PubMed Central journal article supplement (PMC4991498; doi:10.18632/oncotarget.8029), 2016-03-10
Supplement: oncotarget-07-20869-s001.pdf [file oncotarget-07-20869-s001.pdf]

## Geminin overexpression-dependent recruitment and crosstalk with mesenchymal stem cells enhance aggressiveness in triple negative breast cancers

### Supplementary Materials

**Supplementary Figure S1A: Fold change in expression of indicated proteins normalized to tubulin and compared to values found in HME cells**

|         | HME | iGem9 | MDA-MB-231 | MDA-MB-468 | BT-549 |
|---------|-----|-------|------------|------------|--------|
| Geminin | 1   | 4.92  | 5.11       | 6.21       | 5.42   |
| HMGB1   | 1   | 1.07  | 1.02       | 1          | 1.02   |
| c-Abl   | 1   | 4.62  | 5.42       | 5.34       | 2.83   |
| CBP     | 1   | 0.94  | 0.91       | 1.05       | 1.12   |

**Supplementary Figure S1B: Fold change in expression of indicated proteins normalized to H2B and compared to values found on iGem9 G<sub>2</sub>/M cells chromatin**

|         | G2/M | M/G1 | G1/S |
|---------|------|------|------|
| Geminin | 1    | 1    | 0.12 |
| HMGB1   | 1    | 1.72 | 0.11 |
| c-Abl   | 1    | 1.01 | 0.42 |
| CBP     | 1    | 0.72 | 0.36 |
